# Supplementary material for: Thymus musilii Velen. Methanolic Extract: In Vitro and In Silico Screening of Its Antimicrobial, Antioxidant, Anti-Quorum Sensing, Antibiofilm, and Anticancer Activities
Source: MDPI journal article supplement (doi:10.3390/life13010062), 2022-12-25
Supplement: s1 [file s1]

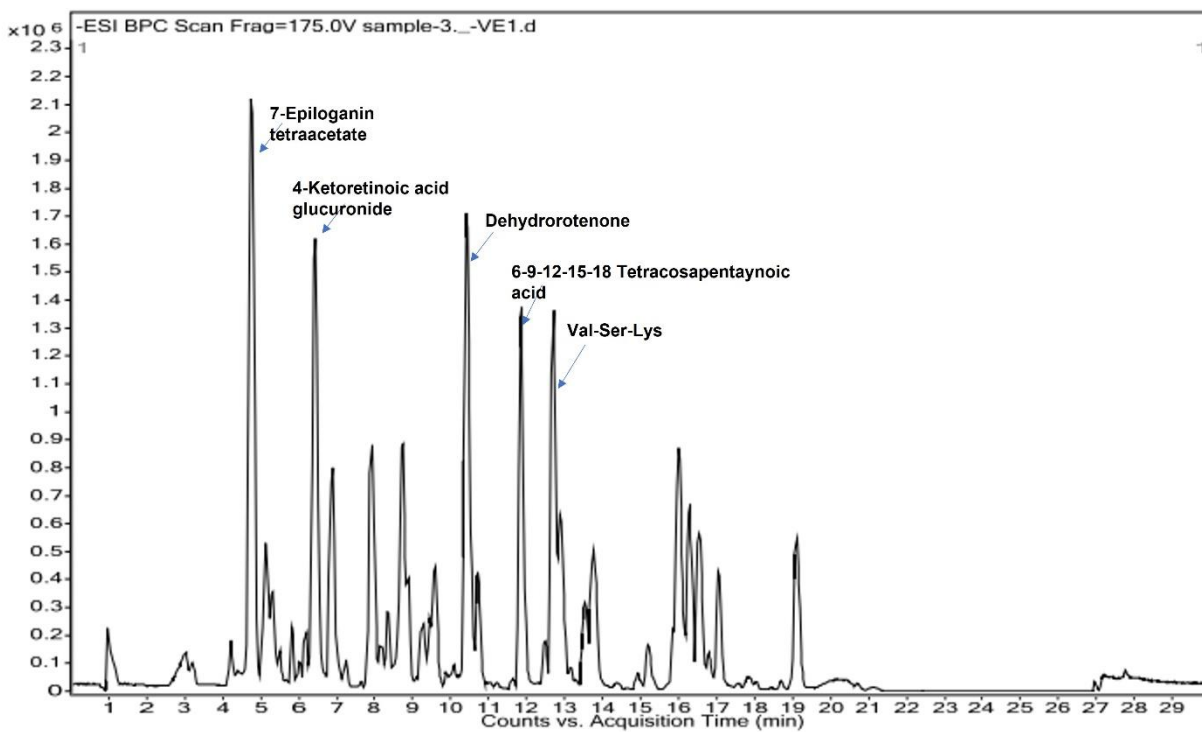

**Supplementary Material Figure S1:** Chromatogram showing the dominant compounds identified by HR-LCMS technique in *T. musilii* methanolic extract.

**Supplementary material Table S1.** Result of the docking experiment performed between the selected target proteins and the identified phytochemicals in *T. musilii* methanolic extract.

| No. | Compounds                                                                                    | 1IJJ          | 2XCT          | 1HD2          | 2QZW          | 4UYA           | 4BBG          | 1JNX          |
|-----|----------------------------------------------------------------------------------------------|---------------|---------------|---------------|---------------|----------------|---------------|---------------|
| 1   | Asn-Met-His                                                                                  | <b>-7.566</b> | <b>-9.705</b> | -4.929        | -3.031        | -8.983         | -6.626        | <b>-5.379</b> |
| 2   | Ser-Met-Arg                                                                                  | -6.368        | -9.035        | -2.432        | -3.569        | -7.372         | -5.386        | -5.908        |
| 3   | Ser-Met-Ser                                                                                  | -7.191        | -9.132        | -4.603        | -4.837        | -7.278         | -6.594        | -3.837        |
| 4   | His-Cys-Asn                                                                                  | -7.383        | -9.077        | <b>-5.022</b> | -3.528        | -8.69          | -6.166        | -4.64         |
| 5   | Phe-His-Gln                                                                                  | -6.523        | -9.252        | -4.780        | -4.888        | <b>-10.062</b> | -6.202        | -4.978        |
| 6   | Glu-Ser                                                                                      | -5.66         | -5.691        | -1.831        | -1.736        | -6.174         | -4.918        | -2.361        |
| 7   | Val-Ser-Lys                                                                                  | -7.019        | -8.721        | -4.32         | -2.915        | -8.191         | -4.353        | -4.595        |
| 8   | Ser-Val-Lys                                                                                  | -6.088        | -9.25         | -5.047        | -2.899        | -7.73          | -4.988        | -4.487        |
| 9   | 10-Hydroxyloganin                                                                            | -5.995        | -7.902        | -4.50         | <b>-5.008</b> | -4.942         | -6.034        | -3.718        |
| 10  | 2-4-6-8-10-dodecapentaenal                                                                   | -3.465        | -6.75         | -0.956        | NA            | -3.72          | -2.251        | -2.092        |
| 11  | 7-Epiloganin-tetraacetate                                                                    | -5.66         | -4.683        | NA            | -3.038        | -6.94          | -5.046        | -4.172        |
| 12  | 2-4-6-Pyrimidinetrione-5-ethyl-1- $\beta$ -D-glucopyranosyl-5-1-methylbutyl                  | -3.215        | -4.621        | -4.951        | -2.514        | -4.564         | -2.315        | -3.916        |
| 13  | 4-Ketoretinoic acid glucuronide                                                              | -5.41         | -8.342        | NA            | -2.917        | -8.87          | <b>-8.794</b> | -3.911        |
| 14  | Epicatechin-pentaacetate                                                                     | -6.335        | -7.692        | -2.527        | -4.065        | -7.301         | -4.692        | -3.112        |
| 15  | Benzenebutanoic acid, 2,5-dihydroxy-3,4-dimethoxy-6-methyl-                                  | -4.943        | -8.353        | -3.83         | -3.353        | -9.05          | -4.781        | -3.38         |
| 16  | Irigenin, Dibenzyl ether                                                                     | -5.277        | -5.916        | NA            | -4.656        | -5.892         | -5.728        | -4.229        |
| 17  | Desmethyl dehydronifedipine                                                                  | -4.145        | -5.414        | -3.514        | -4.452        | -5.42          | -5.144        | -4.741        |
| 18  | 11(12)-dien- 5 $\alpha$ -acetoxy-10 $\beta$ -ol                                              | -3.276        | -3.666        | -2.953        | -2.746        | -4.678         | -4.674        | -2.284        |
| 19  | Gossypol                                                                                     | -4.439        | -9.148        | NA            | -3.364        | -9.127         | -4.392        | -3.262        |
| 20  | Dehydrorotenone                                                                              | -5.499        | -8.15         | NA            | -3.36         | -5.837         | -5.064        | -3.48         |
| 21  | 6-9-12-15-18-Tetracosapentynoic-acid                                                         | -3.384        | -4.91         | NA            | -2.253        | -10.012        | -4.077        | -2.558        |
| 22  | Emetine                                                                                      | -6.808        | -7.477        | -1.563        | -2.549        | -7.034         | -4.812        | -3.154        |
| 23  | 13R-hydroxy-9E-11Zoctadecadienoic                                                            | -2.234        | -4.237        | -1.073        | -0.723        | -4.791         | -2.312        | -0.544        |
| 24  | 1-(9Z-heptadecenoyl)-2-(9Z,12Z-heptadecadienoyl)-3-(9Z,12Z,15Z-octadecatrienoyl)-sn-glycerol | NA            | NA            | NA            | -3.768        | -7.379         | NA            | -3.446        |
| -   | <b>Reference ligand/ Co-crystal inhibitor</b>                                                | <b>-7.973</b> | <b>-8.521</b> | <b>-7.245</b> | <b>-7.851</b> | <b>-7.897</b>  | <b>-8.684</b> | <b>-</b>      |

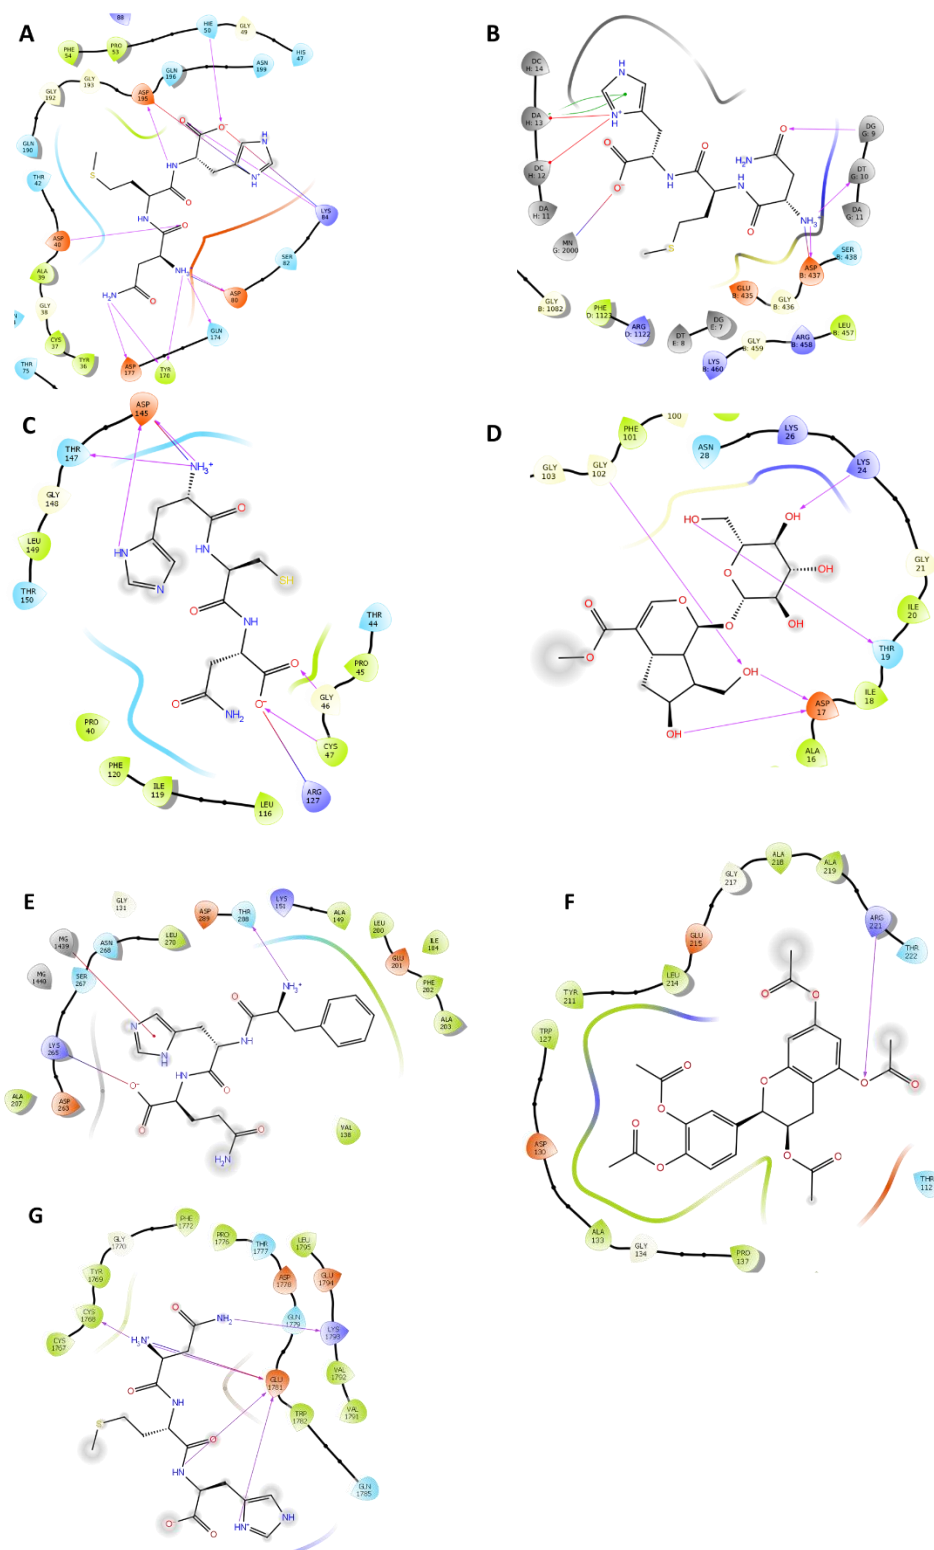

**Supplementary material Figure S2.** Binding interaction of promising compound identified in docking study with different receptor **A.** Asn-Met-His with *S. aureus* TyrRS (PDB ID: 1JIJ); **B.** Asn-Met-His with *S. aureus* DNA gyrase (PDB ID: 2XCT); **C.** His-Cys-Asn with Human peroxiredoxin 5 (PDB ID: 1HD2); **D.** 10-Hydroxyloganin with *C. albicans* Sap 1 (PDB ID: 2QZW); **E.** Phe-His-Gln with MLK4 kinase domain (PDB ID: 4UYA); **F.** 4-Ketoretinoic acid glucuronide with human kinesin (PDB ID: 4BBG); **G.** Asn-Met-His with BRCT protein (PDB ID: 1JNX).
